# Supplementary material for: Distinct Subtypes of Gastric Cancer Defined by Molecular Characterization Include Novel Mutational Signatures with Prognostic Capability
Source: Oxford University Press journal article supplement (doi:10.1158/0008-5472.can-15-2443), 2016-02-08
Supplement: 00085472can152443-sup-155113_1_supp_3195330_nwlp8c.xlsx [file 00085472can152443-sup-155113_1_supp_3195330_nwlp8c.xlsx]

## Sheet: Sheet2
Published publications	Cohort
Chen K, Yang D, Li X, et al: Mutational landscape of gastric adenocarcinoma in Chinese : Implications for prognosis and therapy. Proc Natl Acad Sci 6:1–6, 2015	Tianjin China
Cancer T, Atlas G: Comprehensive molecular characterization of gastric adenocarcinoma. Nature , 2014	TCGA
Wang K, Yuen ST, Xu J, et al: Whole-genome sequencing and comprehensive molecular profiling identify new driver mutations in gastric cancer. Nat Genet 46:573–82, 2014	Hong Kong
Wong SS, Kim K-M, Ting JC, et al: Genomic landscape and genetic heterogeneity in gastric adenocarcinoma revealed by whole-genome sequencing. Nat Commun 5:5477, 2014	S. Korean
Kakiuchi M, Nishizawa T, Ueda H, et al: Recurrent gain-of-function mutations of RHOA in diffuse-type gastric carcinoma. Nat Genet 46:583–7, 2014	Japan
